# Supplementary material
Source: PubMed Central journal article supplement (PMC5707165)
Supplement: jci-127-77217-s001.pdf [file jci-127-77217-s001.pdf]

## **Supplemental Material**

### **p120-catenin is an obligate haploinsufficient tumor suppressor in intestinal neoplasia**

**\*Sarah P. Short, \*Jumpei Kondo, Whitney G. Smalley-Freed, Haruna Takeda<sup>3</sup>, Michael R. Dohn, Anne E. Powell, Robert H. Carnahan, Mary K. Washington, Manish Tripathi, D. Michael Payne, Nancy A. Jenkins, Neal G. Copeland, Robert J. Coffey, Albert B. Reynolds**

| Genotype                                | # of Tumors | Score (Mean $\pm$ SD) |
|-----------------------------------------|-------------|-----------------------|
| <i>Apc</i> <sup>1638N/+</sup>           | 8           | 2.38 $\pm$ 0.52       |
| <i>Apc</i> <sup>1638N/+</sup> ; p120 KO | 35          | 1.09 $\pm$ 0.28       |

**Supplemental Table 1.** Tumors from *Apc*<sup>1638N/+</sup>; *p120*<sup>ff</sup>; *Villin*<sup>CreERT2</sup> mice treated with corn oil (*Apc*<sup>1638N/+</sup>) or tamoxifen (*Apc*<sup>1638N/+</sup>; p120 KO) were labelled by immunofluorescence with specific p120 antibodies and the signal intensity estimated on a scale of 0 – 4. Scoring: 0= complete p120 KO, 4 = WT p120 staining. Scores are shown as the mean  $\pm$  standard deviation. *P*=0.043, unpaired Student's t-test.

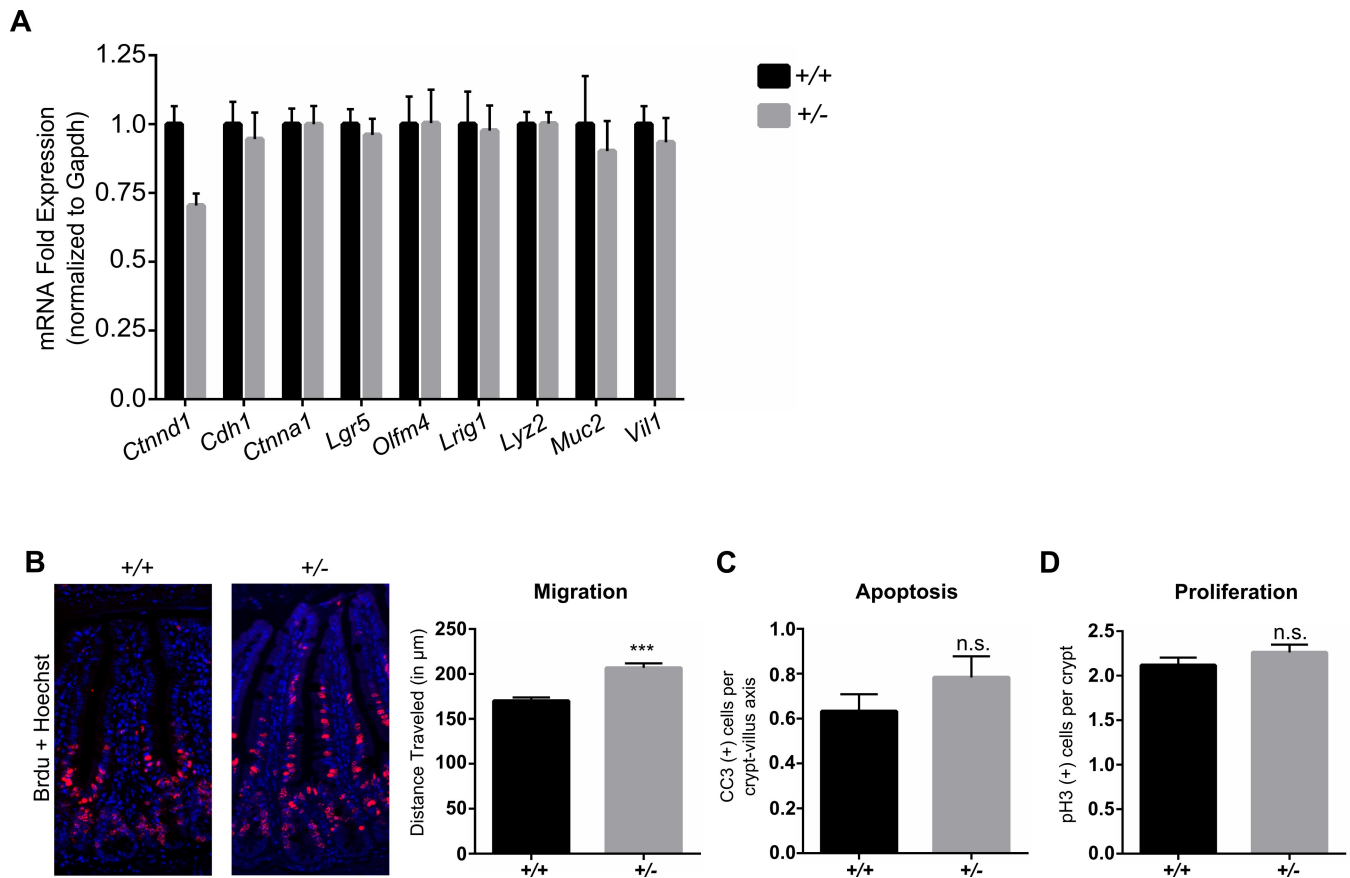

**Supplementary Figure 1.** Intestinal homeostasis is not obviously altered by p120 heterozygosity. **(A)** qRT-PCR analysis of small intestinal samples from littermate  $p120^{+/+}$  (+/+) and  $p120^{+/-}$  mice (+/-) ( $n=5$  mice per genotype). While p120 (*Ctnnd1*) is decreased, no change in stem cell or differentiation markers was observed. **(B)** p120 WT (+/+) and heterozygous (+/-) mice were injected with BrdU and sacrificed 36 hours treatment. Distance of migrated BrdU (+) cells was measured by Metamorph software and quantified (right, \*\*\* $P<0.001$ , unpaired Student's t-test). **(C)** Quantification of FFPE staining for apoptotic marker cleaved caspase 3 (CC3) and **(D)** cell proliferation marker phospho-histone H3 (pH3). Among these experiments, a small increase in the rate of crypt – villus cell migration was the only significant alteration ( $n=5$  mice and  $\sim 20$  crypt/villus units

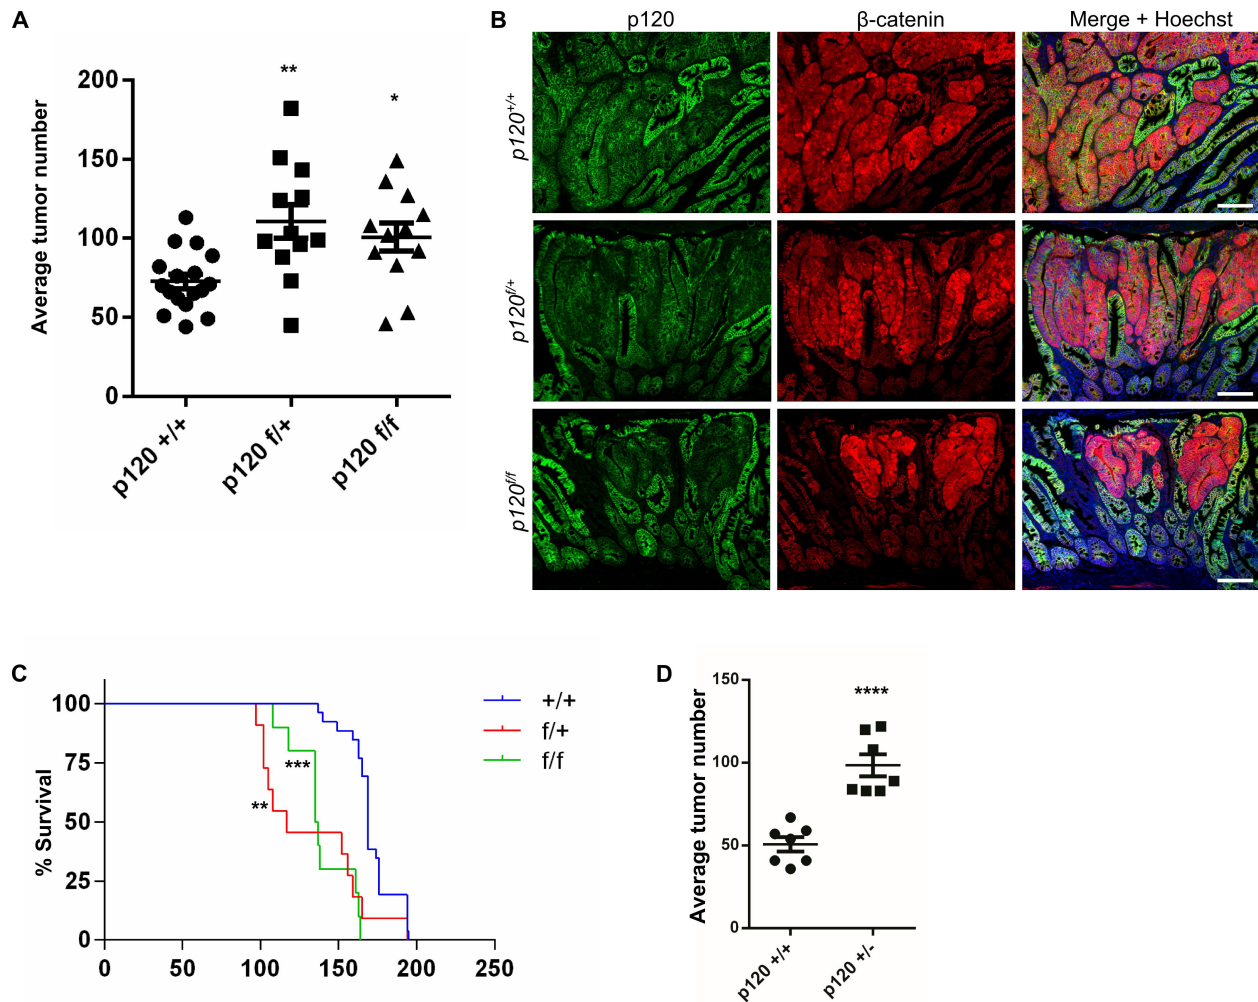

**Supplemental Figure 2.** The tumorigenic consequences of p120 haploinsufficiency are not obviously linked to potential microenvironmental alterations (e.g., inflammation) associated with limited p120 ablation. **(A)**  $Apc^{Min/+}$ ;  $Villin^{CreERT2}$  mice were crossed with p120 floxed mice to yield  $p120^{+/+}$ ,  $p120^{f/+}$ ,  $p120^{f/f}$  cohorts ( $n=16$   $p120^{+/+}$ , 12  $p120^{f/+}$ , and 12  $p120^{f/f}$ ). The  $p120^{f/+}$  cohort, which eliminates unanticipated side effects emanating from p120 null cells, was essentially indistinguishable from  $p120^{f/f}$  groups ( $p120^{+/+}$ ,  $72.8 \pm 5.1$ ;  $p120^{f/+}$ ,  $110.7 \pm 11.6$ ;  $p120^{f/f}$ ,  $100.1 \pm 11$ ) ( $*P < 0.05$ ,  $**P < 0.01$  versus  $p120^{+/+}$  cohort, one-way ANOVA pairwise comparisons with Tukey's correction,  $p120^{f/+}$  vs.  $p120^{f/f}$  nonsignificant). **(B)** Representative tumors from each genotype immunostained for p120 (green) and  $\beta$ -catenin (red). Scale bar, 200  $\mu$ m. **(C)** Decreased survival of  $p120^{f/+}$  ( $**P < 0.01$ ) and  $p120^{f/f}$  cohorts ( $***P < 0.001$ , Log-rank test) as compared to WT. **(D)**  $Apc^{Min/+}$  mice were crossed with p120 heterozygous mice to yield  $p120^{+/+}$  and  $p120^{+/-}$   $Apc^{Min/+}$  cohorts, enabling comparison of haploinsufficiency with no other variables ( $n=7$  mice per group). Tumor numbers for  $Apc^{Min/+}$ ;  $p120^{+/-}$  and  $Apc^{Min/+}$ ;  $p120^{+/+}$  littermate controls ( $98.3 \pm 6.6$  vs.  $50.7 \pm 4.3$ ,  $****P < 0.001$ , unpaired Student's t-test) are shown. Error bars on all graphs represent SEM.

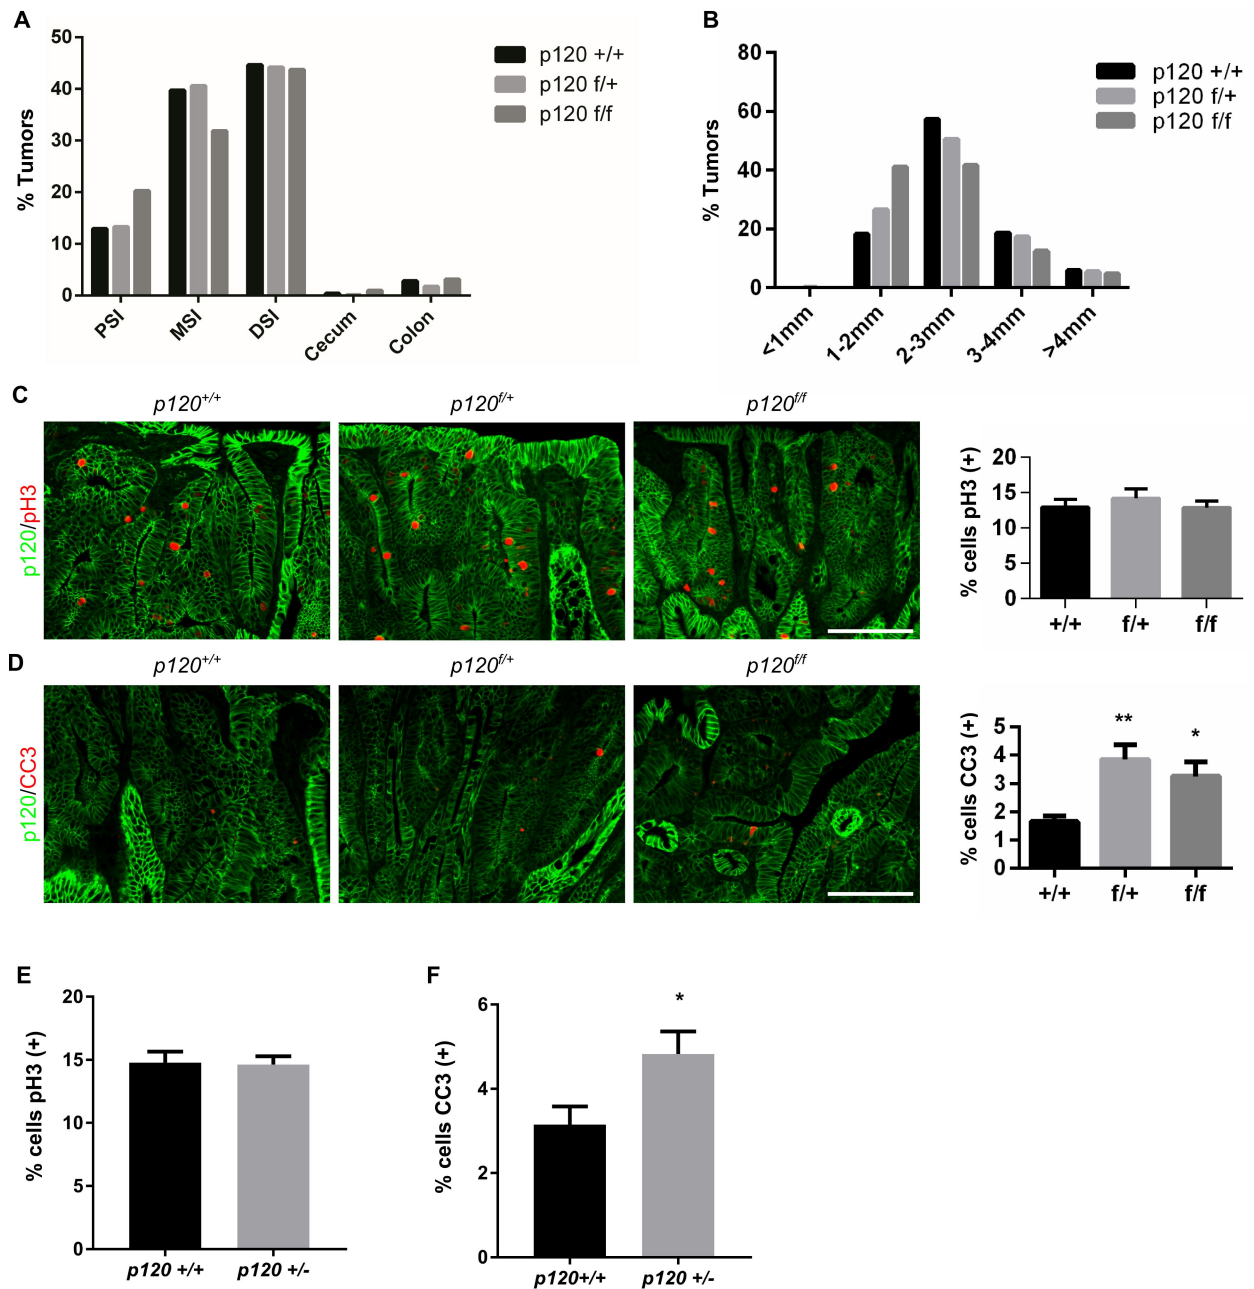

**Supplemental Figure 3.** Increased apoptosis associated with monoallelic p120 loss. **(A)** Intestines from *Apc<sup>Min</sup>; Vil-CreER; p120 floxed* mice were divided into the proximal (PSI), middle (MSI), and distal (DSI) small intestine, cecum, and colon. Limited p120 KO did not affect tumor distribution in *p120<sup>f/+</sup>* and *p120<sup>f/f</sup>* cohorts. **(B)** Tumor size was measured by caliper in *Apc<sup>Min</sup>; Vil-CreER; p120 floxed* mice. **(C)** Tumor samples were immunolabeled for cell proliferation marker phospho-histone H3 (pH3, left) and the results quantified (right,  $n=25$  high powered fields per group). **(D)** Tumor samples were immunolabelled for apoptotic marker cleaved caspase 3 (CC3, left) and the results quantified (right,  $n=25$  high powered fields per group). Apoptosis was significantly elevated in the *p120<sup>f/+</sup>* and *p120<sup>f/f</sup>* cohorts. (\* $P<0.05$ , \*\* $P<0.01$  vs *p120<sup>+/+</sup>* group, one-way ANOVA pairwise comparisons with Tukey's correction, *p120<sup>f/+</sup>* vs. *p120<sup>f/f</sup>* nonsignificant). Scale bar, 100 $\mu$ m. **(E)** Cell proliferation was measured in *Apc<sup>Min/+</sup>; p120<sup>+/-</sup>* and *Apc<sup>Min/+</sup>; p120<sup>+/+</sup>* (control) animals by pH3 immunostaining. **(F)** Increased apoptosis (CC3 staining) associated with monoallelic p120 ablation in *Apc<sup>Min/+</sup>* mice (\* $P<0.05$ , unpaired Student's t-test). Error bars on all graphs represent SEM.

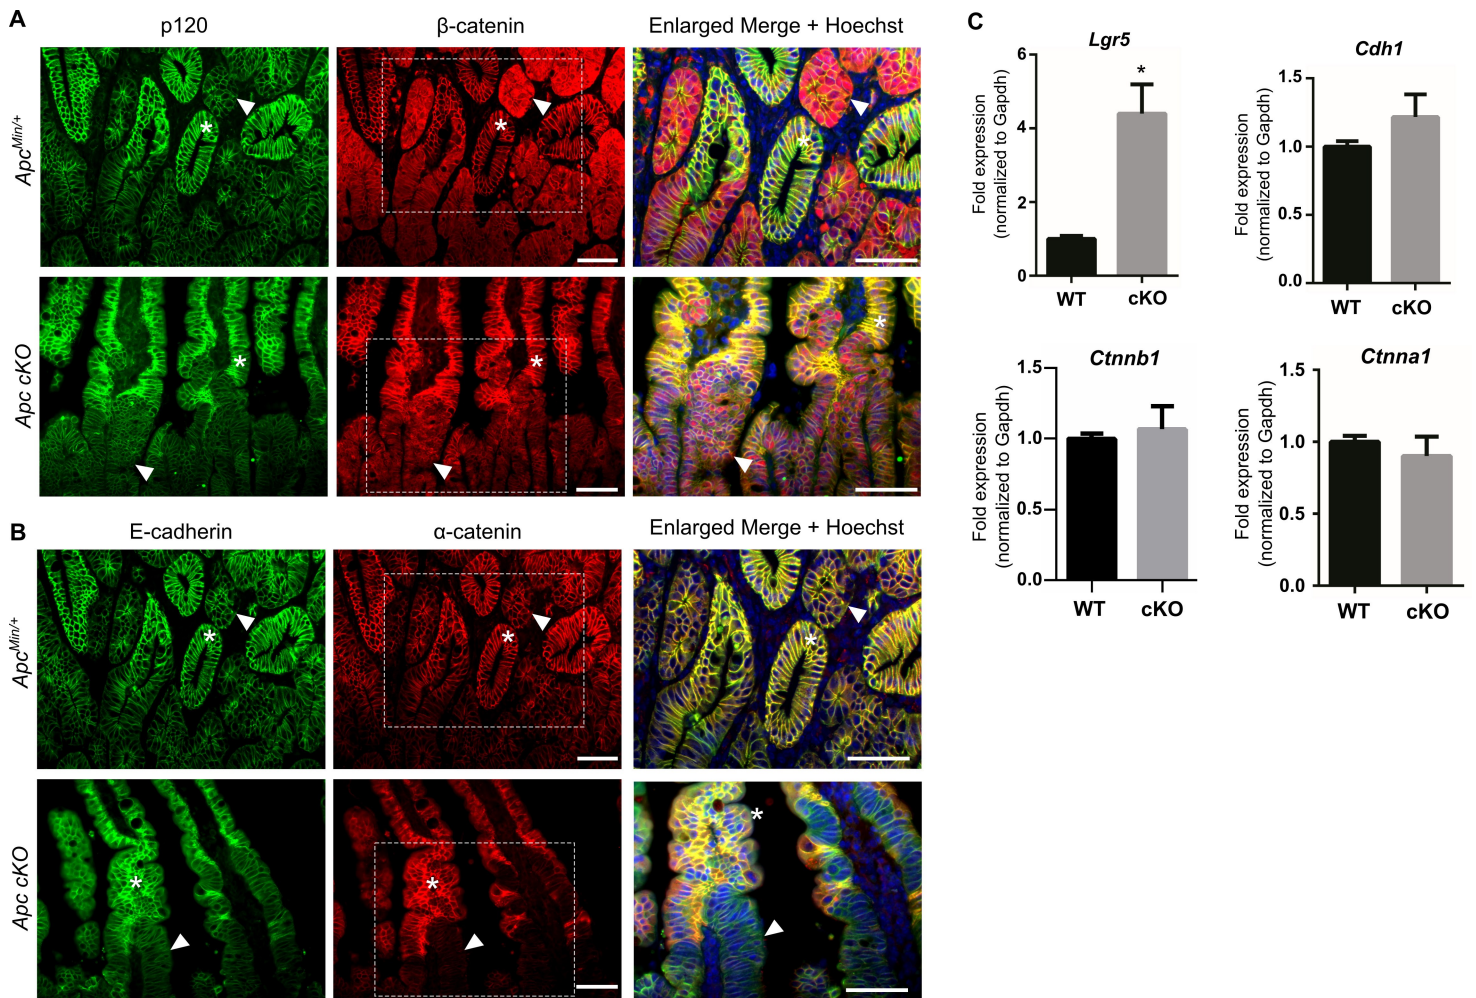

**Supplemental Figure 4.** p120, E-cadherin, and  $\alpha$ -catenin co-localize and vary together in response to changes in *Apc* status. **(A)** Serial sections from FFPE samples of an *Apc<sup>Min/+</sup>* intestinal adenoma (top panels) or small intestinal tissue from an *Apc* cKO mouse 3 days post-tamoxifen treatment (lower panels) were co-stained for p120 and  $\beta$ -catenin or **(B)** E-cadherin and  $\alpha$ -catenin. p120, E-cadherin and  $\alpha$ -catenin colocalize and their levels vary in sync under all conditions, including WT (\*) and *Apc*-ablated tumor and cKO tissue (arrowhead), indicating that the E-cadherin complex remains intact regardless of staining intensity.  $\beta$ -catenin levels, on the other hand, can be independently controlled by events impacting the canonical Wnt pathway (e.g., *Apc*-LOH) leading to staining that varies inversely to that of the other core cadherin components. Boxes represent area enlarged. Scale bar, 100 $\mu$ m. **(C)** qRT-PCR analysis of *Apc* cKO intestine samples show elevated *Lgr5* expression, consistent with constitutive Wnt activation, while mRNAs encoding the cadherin complex components are unchanged ( $n=5$  mice per group). Error bars represent SEM (\* $P<0.05$ , unpaired t-test with Welch's correction).

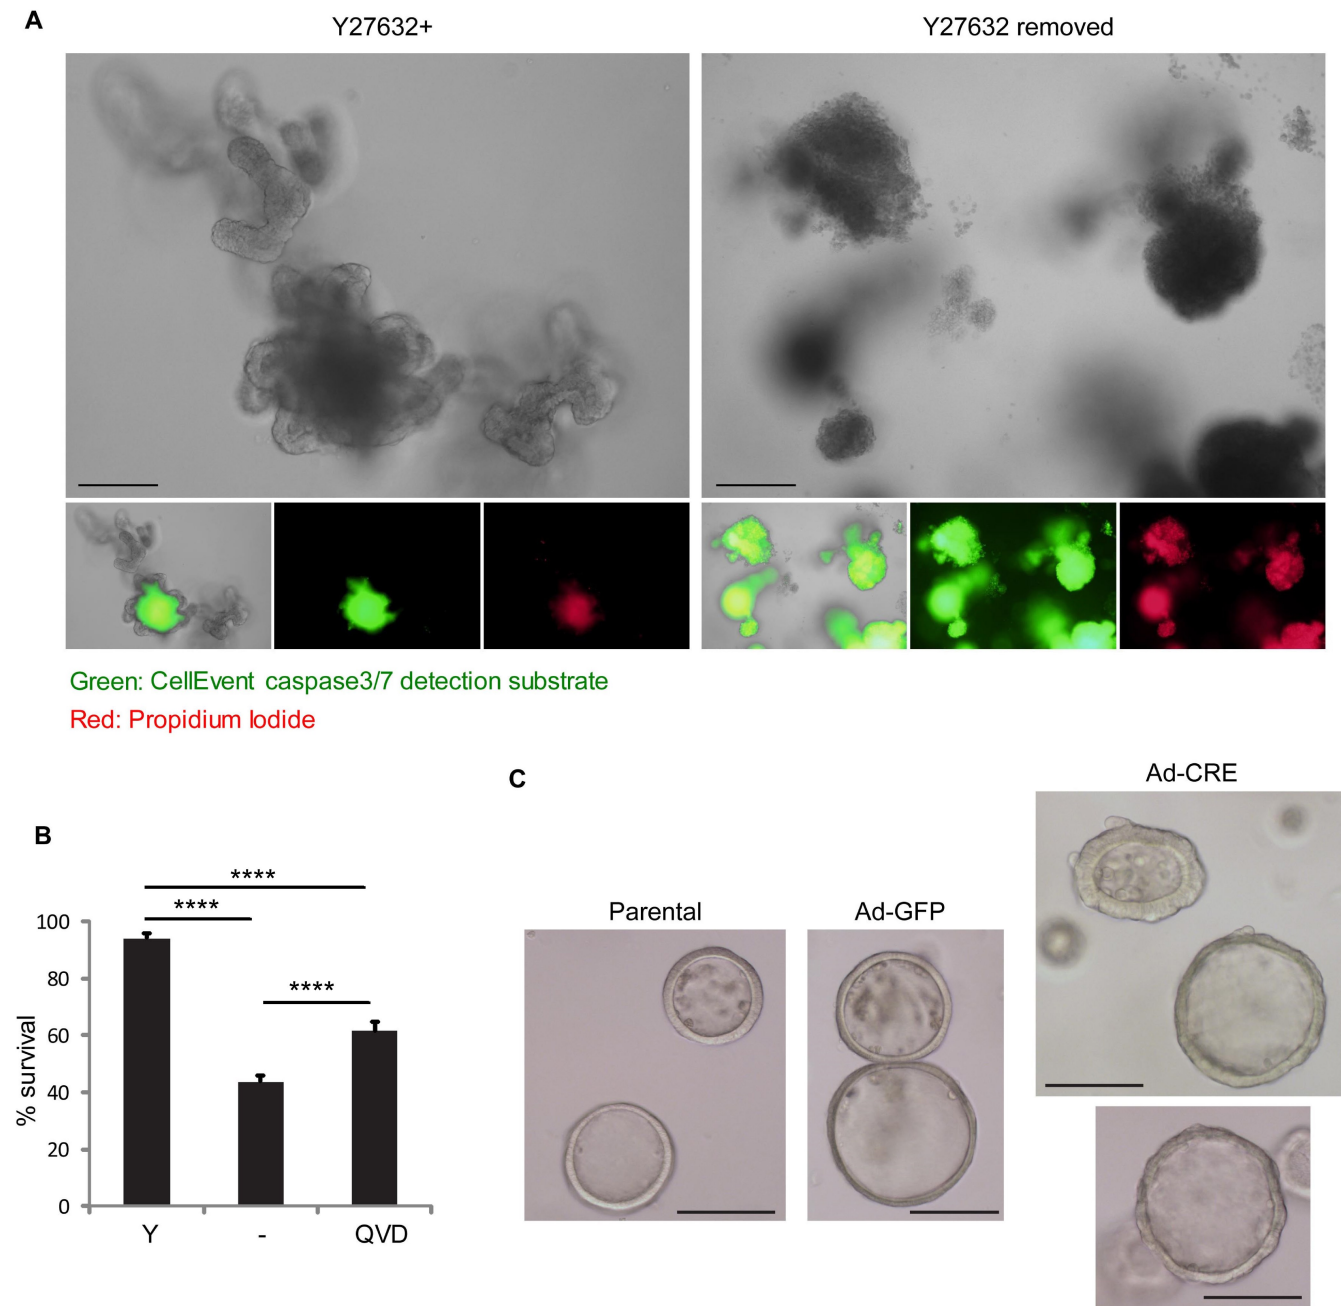

**Supplementary Figure 5.** Biallelic p120 loss induces cell death in *Apc<sup>Min/+</sup>* tumor organoids. **(A)** Representative images of *Apc<sup>Min/+</sup>; p120<sup>ff</sup>* small intestinal tumor organoids infected with Adeno-CRE virus cultured with or without Y27632. Note that organoids cultured with Y27632 are translucent with smooth surfaces, while organoids cultured without Y27632 are dark with dispersed cells. Non-Y27632 treated organoids are widely positive for both caspase3/7 activity (detected by CellEvent Caspase-3/7, green) and propidium iodide (red), while organoids with Y27632 have dead cells only in the lumen where differentiated cells are shed. Scale bar, 100 $\mu$ m. **(B)** Quantified viability of *Apc<sup>Min/+</sup>; p120<sup>ff</sup>* tumor organoids infected with Adeno-CRE virus. Viability was evaluated after 5 days of culture with Y27632 (Y, 10 $\mu$ M), without Y27632 (-), or with the pan caspase inhibitor Q-VD-Oph (QVD, 50 $\mu$ M). Data is shown as mean  $\pm$  SEM of 4 cultures for each condition (~200 organoids per culture). (\*\*\*\* $P$ <0.0001, one-way ANOVA pairwise comparisons with Tukey's correction). **(C)** Representative images of *Apc<sup>Min/+</sup>; p120<sup>ff</sup>* tumor organoids with cystic morphology for p120-KO (Ad-CRE) and control (Parental and Ad-GFP) organoids. Scale bar, 100 $\mu$ m.

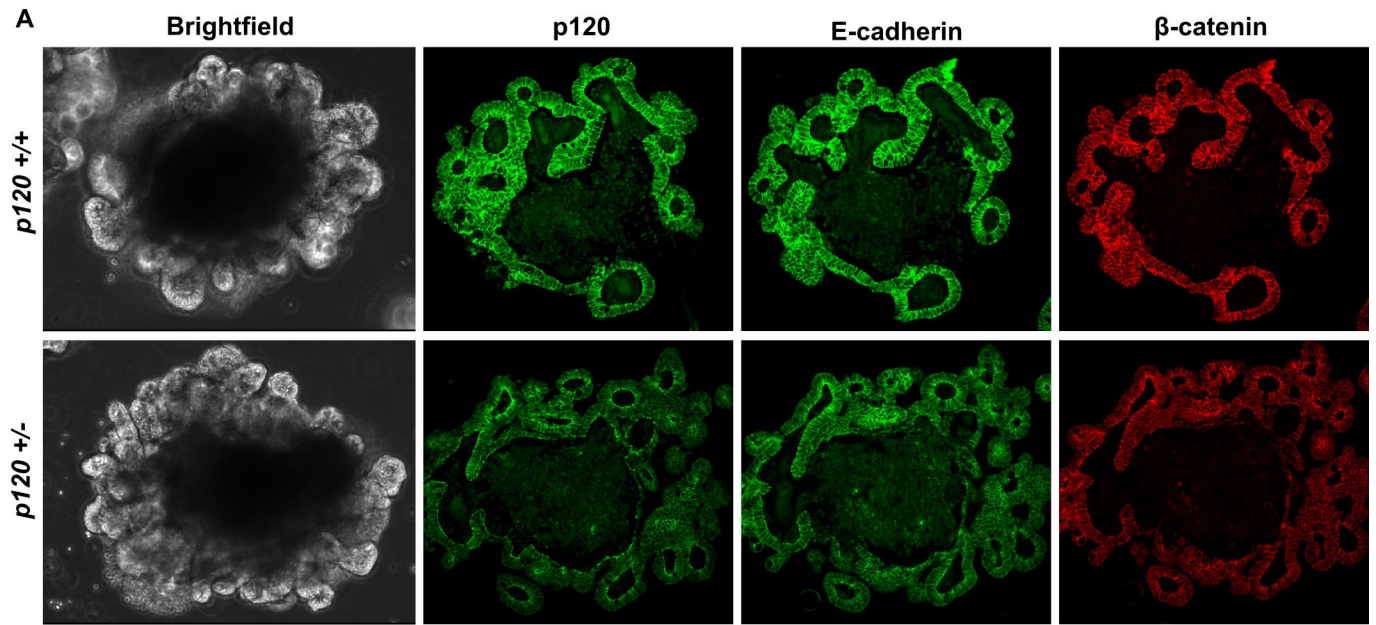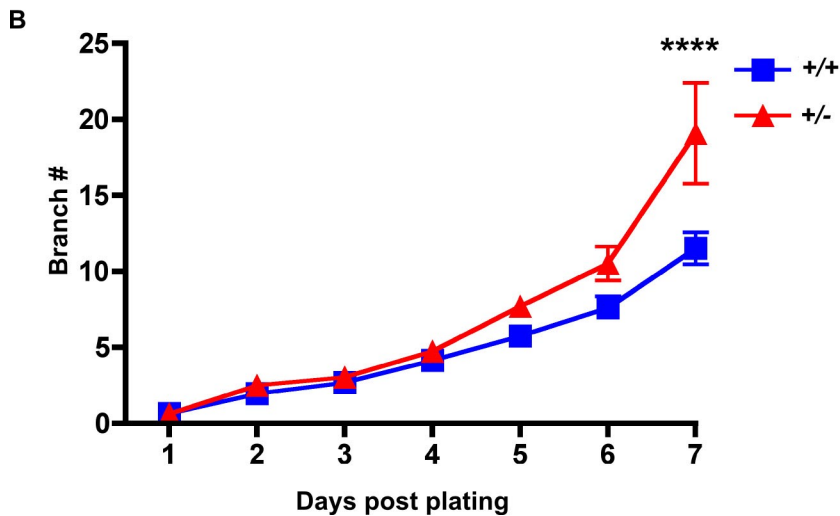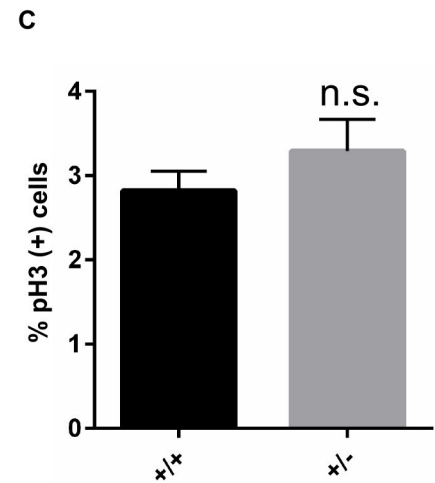

**Supplementary Figure 6.** Increased branching associated with monoallelic p120 ablation in small intestinal enteroids. **(A)** Representative bright-field images from  $p120^{+/+}$  and  $p120^{+/-}$  small intestinal enteroids (far left), and immunofluorescence-labelled versions thereof: p120 (middle left), E-cadherin (middle right), and  $\beta$ -catenin (far right). Note more complex branching structure and decreased staining intensity in  $p120^{+/-}$  samples. **(B)** Small intestinal enteroids were sheared to single buds and branch number was quantified daily over 7 days ( $n > 60$  organoids per genotype per time point) (Day 7, \*\*\*\* $P < 0.0001$ , two-way ANOVA with Sidak's multiple comparison test). Results representative of 3 independent experiments. **(C)** Monoallelic p120 ablation did not significantly alter organoid cell proliferation rates (as measured by p120 staining). Error bars represent SEM. n.s., nonsignificant, Student's t-test.



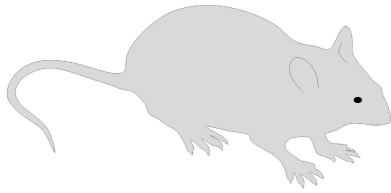

**LSL-SB11 (neo/neo); T2/Onc2 (Tg/Tg)**

**X**

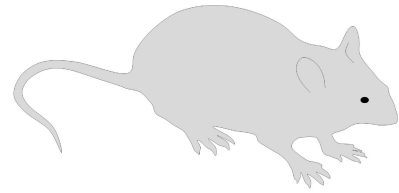

**Sensitizing mutant (mut/+); Vil-CreERT2**

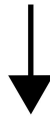

**1) LSL-SB11 (neo/+); T2/Onc2 (Tg/+); LSL-K-ras<sup>(G12D/+)</sup>; Vil-CreERT2**

**2) LSL-SB11 (neo/+); T2/Onc2 (Tg/+); Smad4<sup>(fl/+)</sup>; Vil-CreERT2**

**3) LSL-SB11 (neo/+); T2/Onc2 (Tg/+); p53<sup>(R172H/+)</sup>; Vil-CreERT2**

**Supplementary Figure 7.** Outline of breeding crosses for Sleeping Beauty mutagenesis studies. For details, see Takeda et al. *Nature Genetics*. 2015.

|               | <b>Forward Sequence</b>    | <b>Reverse Sequence</b>  | <b>Citation/<br/>PrimerBank ID</b>    |
|---------------|----------------------------|--------------------------|---------------------------------------|
| <i>Axin2</i>  | TGACTCTCCTTCCAGATCCCA      | TGCCCACACTAGGCTGACA      | 31982733a1                            |
| <i>cMyc</i>   | ATGCCCTCAACGTGAACTTC       | GTCGCAGATGAAATAGGGCTG    | 293629266c1                           |
| <i>Lgr5</i>   | CCAATGGAATAAAGACGACGGCAACA | GGCCTTCAGGTCTTCTCAAAGTCA | Jaks et al. <i>Nat Genet.</i> 2008    |
| <i>Cdh1</i>   | CCAACAGGGACAAAGAAACAAAGG   | GATGACACGGCATGAGAATAGAGG | Slorach et al. <i>Genes Dev.</i> 2011 |
| <i>Ctnna1</i> | GCCAAGCAGATGTGCATGATC      | CAGAGGTGTTTTGAGTGACCTT   | Slorach et al. <i>Genes Dev.</i> 2011 |
| <i>Ctnnb1</i> | GGGTGGCATAGAGGCTCTTGT      | GCTCAGTGATGTCTTCCCTGTCA  | Slorach et al. <i>Genes Dev.</i> 2011 |
| <i>Ctnnd1</i> | AGCTTGTGGAGAATTGTGTTTGC    | TGCCTGTGGGATTTACGAT      | Slorach et al. <i>Genes Dev.</i> 2011 |
| <i>Zbtb33</i> | GAACTCCTTGAATGAACAGCGT     | CCCAGCAACTGAGAAGAGC      | 9937986a1                             |
| <i>Gapdh</i>  | TGACCTCAACTACATGGTCTACA    | CCGTGAGTGGAGTCATACTGG    |                                       |

**Supplemental Table 2.** Primer sequences for qRT-PCR analysis. Primers not previously cited were designed using NCBI-GENE-‘Pick Primers’ function. Primer sequences obtained through the PrimerBank database (Massachusetts General Hospital) are identified according to their PrimerBank ID numbers.
